# Supplementary material for: High electrochemical stability of a 3D cross-linked network PEO@nano-SiO2 composite polymer electrolyte for lithium metal batteries
Source: Royal Society of Chemistry journal article supplement (doi:10.1039/c9ta00560a), 2019-01-01
Supplement: c9ta00560a1.pdf [file c9ta00560a1.pdf]

## Supporting information

### High Electrochemical Stability of 3D Cross-linked Network

### PEO@nano-SiO<sub>2</sub> Composite Polymer Electrolyte for Lithium Metal

### Batteries

Yinghua Zhu,<sup>a,b</sup> Jiang Cao,<sup>\*a,d</sup> Hong Chen,<sup>b,c</sup> Qipeng Yu,<sup>a</sup> and Baohua Li,<sup>\*a</sup>

<sup>a</sup> Engineering Laboratory for Functionalized Carbon Materials and Engineering Laboratory for the Next Generation Power and Energy Storage Batteries Graduate School at Shenzhen, Tsinghua University, Shenzhen 518055, P. R. China

<sup>b</sup> College of Material Science and Engineering, Central South University of Forestry and Technology, Changsha 410004, Hunan, P. R. China

<sup>c</sup> School of Materials Science and Energy Engineering, Foshan University, Foshan 528000, Guangdong, P. R. China

<sup>d</sup> R&D Center, Shenzhen Senior Technology Material Co., LTD, Shenzhen 518106, P. R. China

**Table S1.** Results of electrolyte uptake ability tests

| Sample                   | Uptake (wt%) | Ionic conductivity (S cm <sup>-1</sup> ) |
|--------------------------|--------------|------------------------------------------|
| 3D-GPE                   | 300.9%       | 2.3×10 <sup>-3</sup>                     |
| 4%-SiO <sub>2</sub> -GPE | 276%         | 3.2×10 <sup>-3</sup>                     |
| 3D-GCPE4                 | 340%         | 4.65×10 <sup>-3</sup>                    |
| 3D-GCPE8                 | 274%         | 2.2×10 <sup>-3</sup>                     |

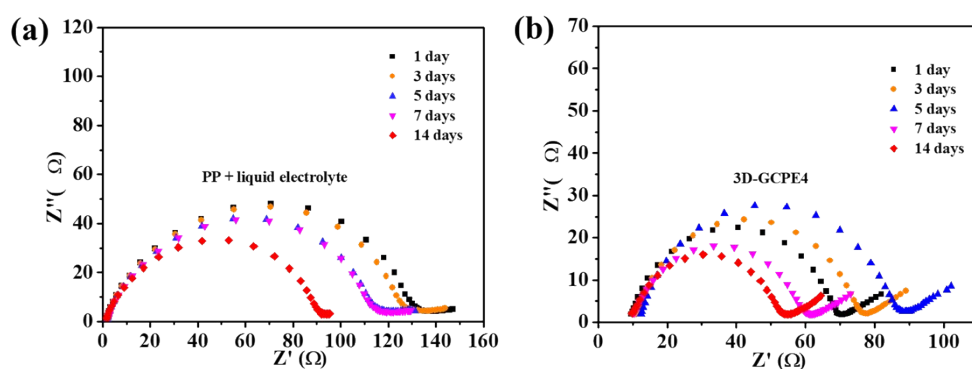

**Fig. S1.** Electrochemical impedance spectra of a symmetric cell Li/Electrolyte/Li after different aging time at room temperature (a) PP+ liquid electrolyte, (b) 3D-GCPE4.

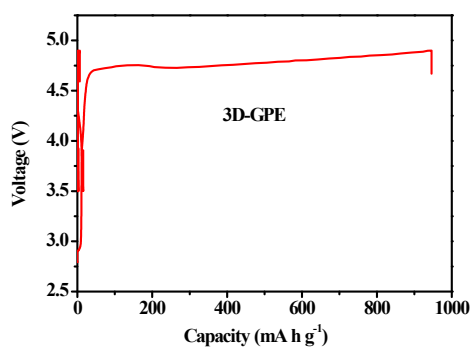

**Fig. S2** Charge/discharge voltage profile of Li/3D-GPE/LiNi<sub>0.5</sub>Mn<sub>1.5</sub>O<sub>4</sub> at 0.5C.

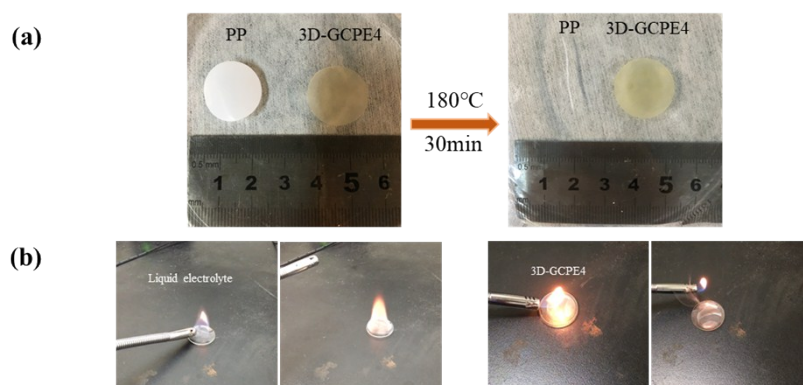

**Fig. S3.** (a) photographs of thermal shrinkage of PP separator and 3D-GCPE4 membrane at 180 °C for 30 min. (b) Flammability testing for liquid electrolyte and 3D-GCPE4, samples were exposed to flame for 5s.

Fig. S3a is the dimension thermal stability of dimensional thermal stability experiment. After exposure to 180 °C for 30 min, PP separator sharply shrank and partially melted, while the 3D-GCPE4 membrane still retains original feature with negligible change in its dimensions. Fig. S3b is combustion test of the 1M LiPF<sub>6</sub> in EC/DMC/DEC and 3D-GCPE4. After exposure to flame for 5s, the liquid electrolyte exhibits high flammability. on the contrary, the 3D-GCPE4 exhibits low flammability and did not continue to burn.

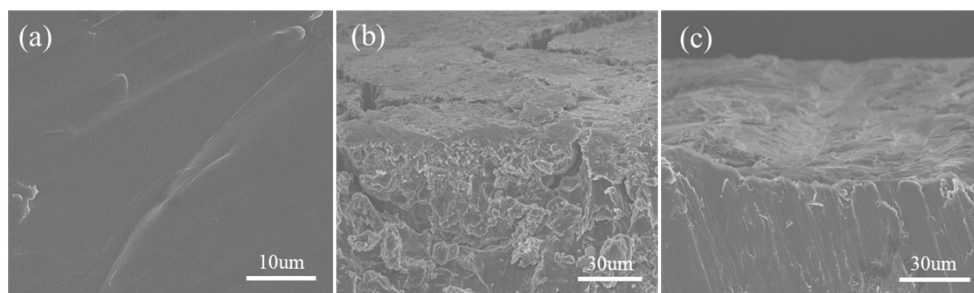

**Fig. S4.** SEM images of (a) fresh lithium metal surface. cross-section of lithium metal after 200 cycles at 1C with a configuration of (b) Li/PP + liquid electrolyte/LiFePO<sub>4</sub> cell. (c) Li/3D-GCPE<sub>4</sub>/LiFePO<sub>4</sub> cell.

Fig. S4a is the SEM image of fresh lithium metal surface, which was smooth and without cracks. Fig. S4b, c show the SEM images of cross-section of lithium metal after 200 cycles at 1C. The lithium metal with PP + liquid electrolyte was cracked and pulverized, while the lithium metal with 3D-GCPE<sub>4</sub> was still smooth and compact.
